# Supplementary material
Source: PubMed Central journal article supplement (PMC6362351)
Supplement: EMBR-20-e46429-s002.pdf [file EMBR-20-e46429-s002.pdf]

## Expanded View Figures

### Figure EV1. miR379-410 ko mice demonstrated increased anxiety-related behaviour.

- A Open field test in adult mice. Time spent in the central arena was examined, wt  $n = 51$  (male  $n = 24$  and female  $n = 27$ ), ko  $n = 53$  (male  $n = 24$  and female  $n = 29$ ),  $t_{102} = 3.020$ ,  $**P = 0.0032$ , unpaired Student's  $t$ -test.
- B–E Elevated plus maze test in adult mice. (B) Time spent on open arms (percentage) are shown, wt  $n = 24$  (male), ko  $n = 24$  (male),  $t_{46} = 0.5419$ , ns  $P = 0.5905$ , unpaired Student's  $t$ -test. (C) Time spent on open arms (percentage) is shown, wt  $n = 27$  (female), ko  $n = 29$  (female),  $t_{54} = 4.099$ ,  $***P < 0.001$ , unpaired Student's  $t$ -test. (D) Time spent on open arms (percentage) is shown for pooled data of male and female; wt  $n = 51$  (male  $n = 24$  and female  $n = 27$ ), ko  $n = 53$  (male  $n = 24$  and female  $n = 29$ ),  $t_{102} = 3.265$ ,  $**P = 0.0015$ , unpaired Student's  $t$ -test. Please notice that the genotype effect is mainly in females ( $P < 0.001$ ) but not in males ( $P = 0.5905$ ); Genotype  $\times$  Sex:  $F_{1,100} = 5.551$ ,  $P = 0.020$ , ANOVA. (E) Number of open arm entries is shown; wt  $n = 51$  (male  $n = 24$  and female  $n = 27$ ), ko  $n = 53$  (male  $n = 24$  and female  $n = 29$ ),  $t_{102} = 4.679$ ,  $***P < 0.0001$ , unpaired Student's  $t$ -test.
- F Marble burying test as a measure for repetitive behaviour. Total number of marbles (half and completely) buried by adult miR379-410 wt and ko mice is shown; wt  $n = 49$  (male  $n = 23$  and female  $n = 26$ ), ko  $n = 53$  (male  $n = 24$  and female  $n = 29$ ),  $t_{100} = 2.569$ ,  $*P = 0.0117$ , unpaired Student's  $t$ -test.
- G Pup homing test performed at P9 during developmental milestones. Time spent in the nest area (containing nest litter) is shown, wt  $n = 17$  (male  $n = 8$  and female  $n = 9$ ); ko  $n = 11$  (male  $n = 5$  and female  $n = 6$ ),  $t_{26} = 0.9834$ , ns  $P = 0.3345$ , unpaired Student's  $t$ -test.

Data information: Data are presented as mean  $\pm$  s.e.m.

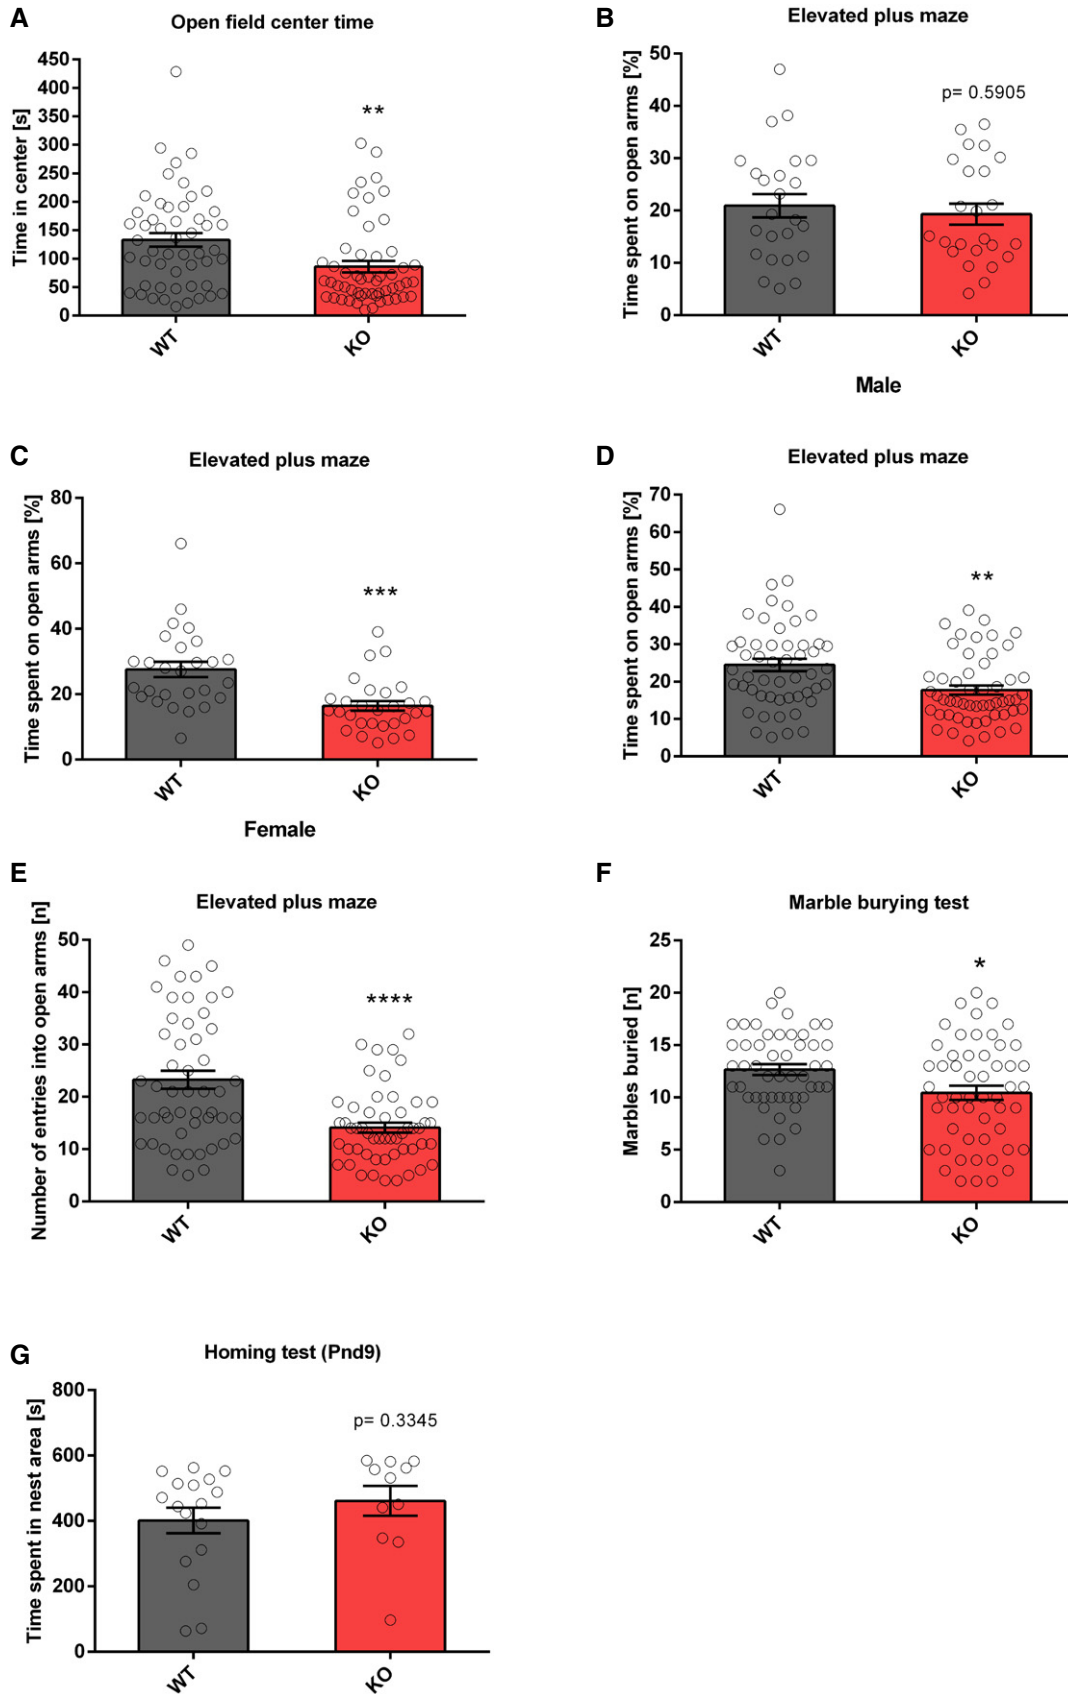

Figure EV1.

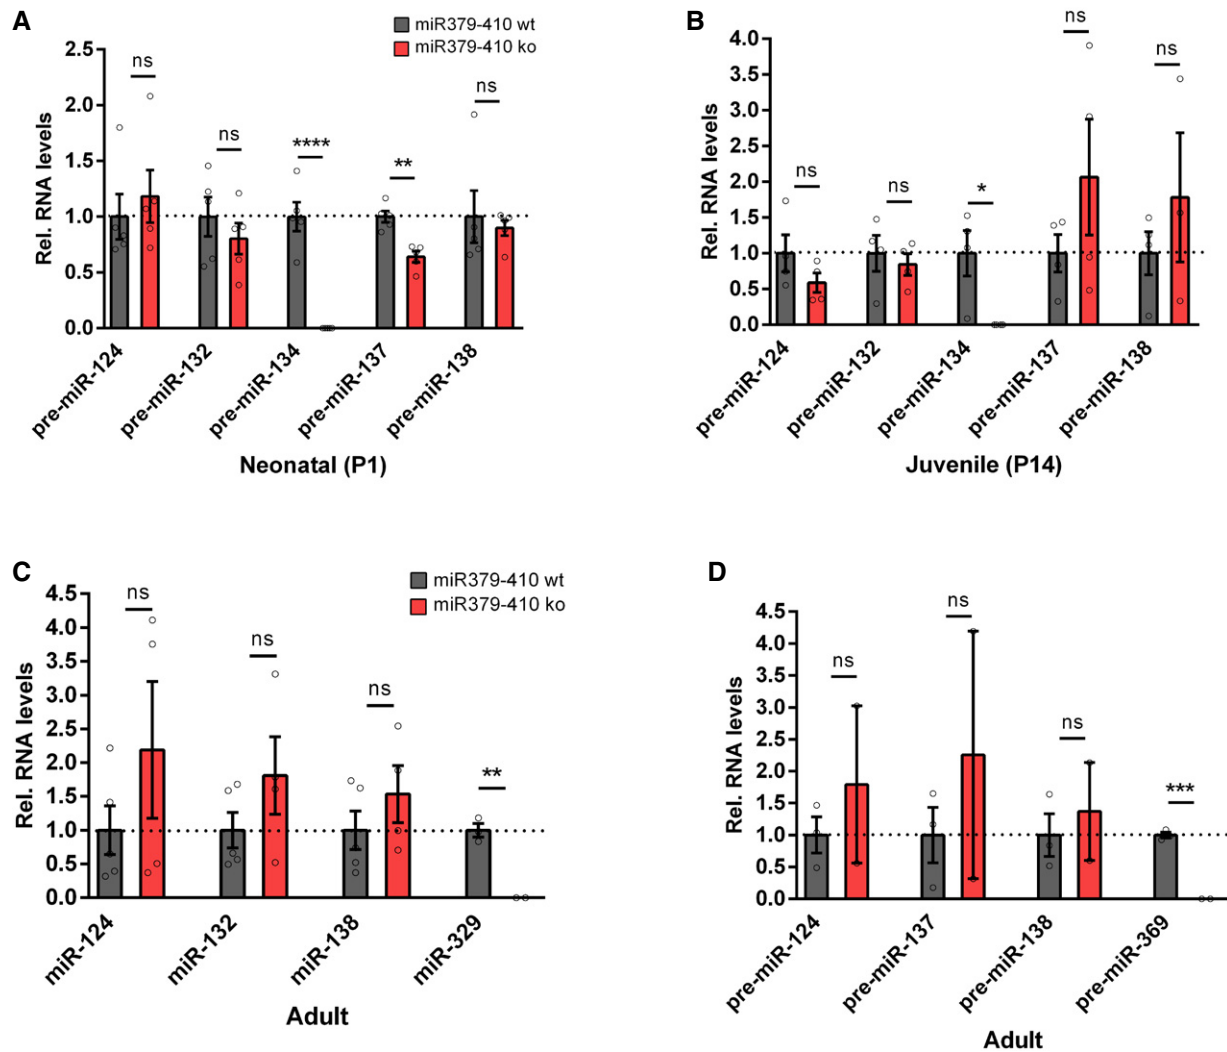

**Figure EV2.** qPCR expression levels of RNA samples in different brain regions and ages of miR379-410 wt/ko mice.

- A Expression of precursor miRNAs in hippocampal neonatal (P1) miR379-410 wt/ko pups: pre-miR-124 (wt  $n = 5$ , ko  $n = 5$ ,  $t_8 = 0.5848$ , ns  $P = 0.5748$ ), pre-miR-132 (wt  $n = 5$ , ko  $n = 5$ ,  $t_8 = 0.8740$ , ns  $P = 0.4076$ ), pre-miR-137 (wt  $n = 5$ , ko  $n = 5$ ,  $t_8 = 5.037$ , \*\* $P = 0.0010$ ), pre-miR-138.2 (wt  $n = 5$ , ko  $n = 5$ ,  $t_8 = 0.4145$ , ns  $P = 0.6894$ ) and from the miR379-410 cluster pre-miR-134 (wt  $n = 5$ , ko  $n = 5$ ,  $t_8 = 7.637$ , \*\*\*\* $P < 0.0001$ ), unpaired Student's  $t$ -test.
- B Expression of precursor miRNAs in hippocampal juvenile (P14) miR379-410 wt/ko mice: pre-miR-124 (wt  $n = 4$ , ko  $n = 4$ ,  $t_6 = 1.406$ , ns  $P = 0.2093$ ), pre-miR-132 (wt  $n = 4$ , ko  $n = 4$ ,  $t_6 = 0.5348$ , ns  $P = 0.6120$ ), pre-miR-137 (wt  $n = 4$ , ko  $n = 4$ ,  $t_6 = 1.250$ , ns  $P = 0.2578$ ), pre-miR-138.2 (wt  $n = 4$ , ko  $n = 3$ ,  $t_5 = 0.9339$ , ns  $P = 0.3932$ ) and from the miR379-410 cluster pre-miR-134 (wt  $n = 4$ , ko  $n = 4$ ,  $t_6 = 3.150$ , \* $P = 0.0198$ ); unpaired Student's  $t$ -test.
- C Expression of mature miRNAs in cerebellum of adult miR379-410 wt/ko mice: miR-124 (wt  $n = 5$ , ko  $n = 4$ ,  $t_7 = 1.214$ , ns  $P = 0.2642$ ), miR-132 (wt  $n = 5$ , ko  $n = 4$ ,  $t_7 = 1.382$ , ns  $P = 0.2095$ ), miR-138 (wt  $n = 5$ , ko  $n = 4$ ,  $t_7 = 1.089$ , ns  $P = 0.3120$ ) and from the miR379-410 cluster miR-329 (wt  $n = 3$ , ko  $n = 2$ ,  $t_3 = 7.720$ , \*\* $P = 0.0045$ ); unpaired Student's  $t$ -test.
- D Expression of precursor miRNAs in cerebellum of adult miR379-410 wt/ko mice: pre-miR-124 (wt  $n = 3$ , ko  $n = 2$ ,  $t_3 = 0.8014$ , ns  $P = 0.4815$ ), pre-miR-137 (wt  $n = 3$ , ko  $n = 2$ ,  $t_3 = 0.8107$ , ns  $P = 0.4769$ ), pre-miR-138.2 (wt  $n = 3$ , ko  $n = 2$ ,  $t_3 = 0.5169$ , ns  $P = 0.6409$ ) and from the miR379-410 cluster pre-miR-369 (wt  $n = 3$ , ko  $n = 2$ ,  $t_3 = 16.78$ , \*\*\* $P = 0.0005$ ); unpaired Student's  $t$ -test. Data are presented as mean  $\pm$  s.e.m.

**Figure EV3.** Clustering of synaptic GO terms and String database protein–protein interaction network.

- A Binary distance matrix of detected GO terms (cellular component). Hierarchical clustering has been performed by the unweighted pair group method with arithmetic mean. GO terms with more than 300 annotated genes are not shown.
- B Complete String database protein–protein interaction network.

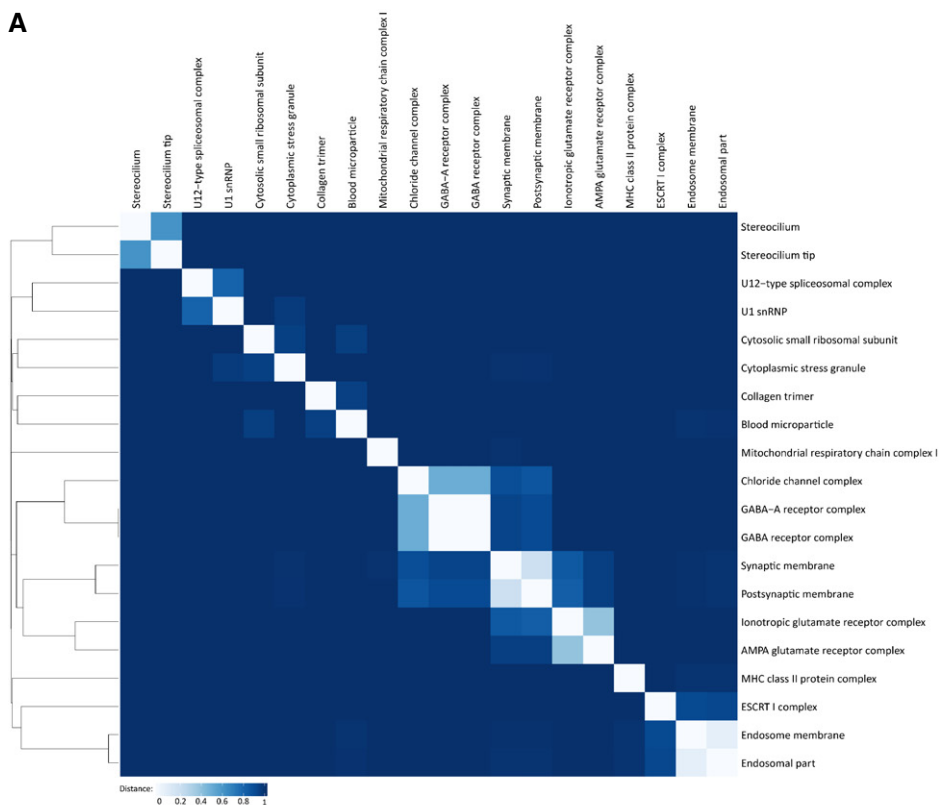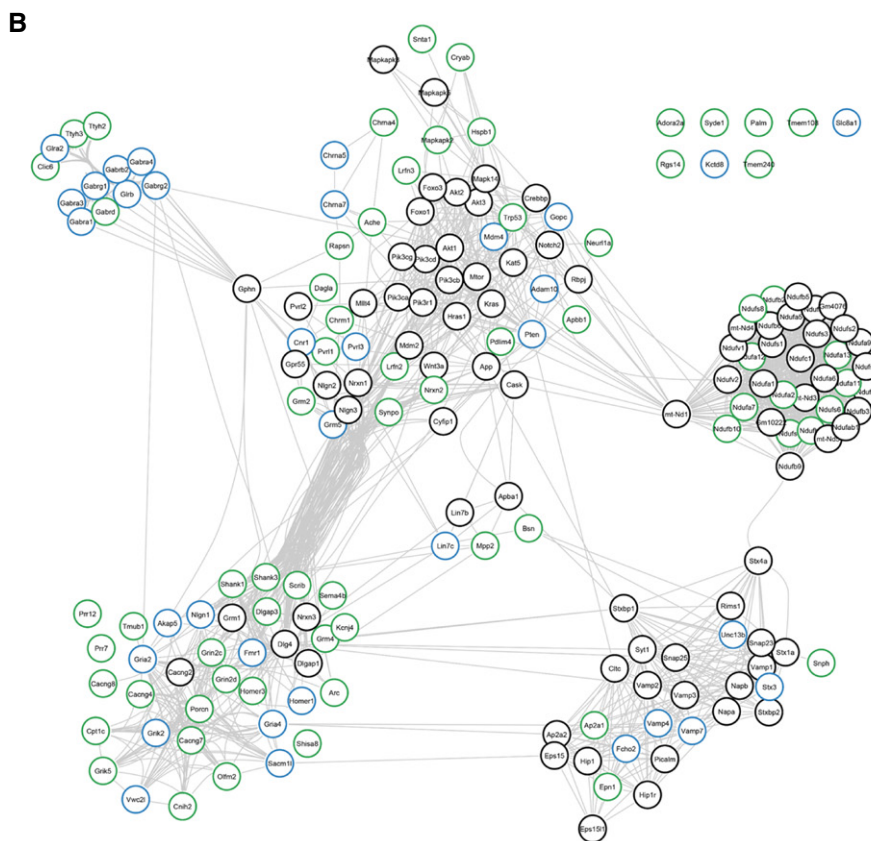

Figure EV3.

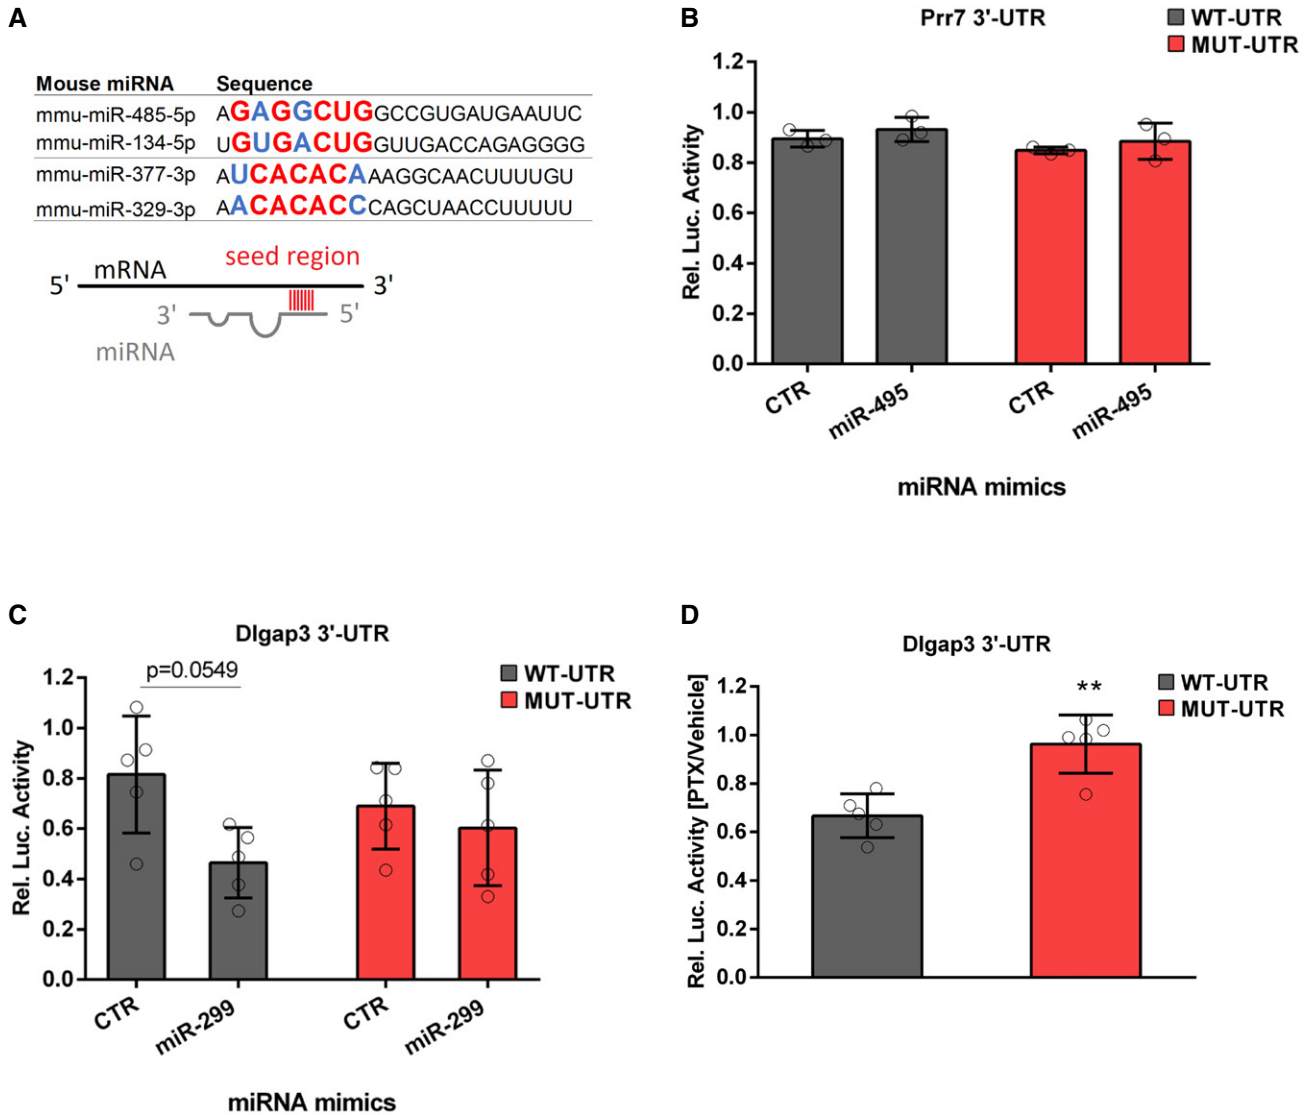

**Figure EV4. miRNA binding site analysis and target validation.**

A miRNAs of the miR379-410 cluster sharing similar seed regions: miR485-5p/miR-134-5p and miR-377-3p/miR-329-3p. Seed regions (nucleotide 2–8) are highlighted in bigger letters, conserved nucleotides in red and those that allow wobble base pairing in blue.

B 3'UTR luciferase reporter gene assays in cultured rat cortical neurons using the Prr7 3'UTR reporter gene (wt or seed mutant) together with miR-495 or control mimic, respectively ( $n = 3$  per group; wt:  $P = 0.7775$ ; mut:  $P = 0.7797$ ; mimic:  $F_{1,8} = 1.816$ ,  $P = 0.2147$ ; utr-construct:  $F_{1,8} = 2.973$ ,  $P = 0.1229$ ; mimic  $\times$  utr-construct:  $F_{1,8} = 9.47e-006$ ,  $P = 0.09976$ ); two-way ANOVA.

C 3'UTR luciferase reporter gene assays in cultured rat cortical neurons using the Dlgap3 3'UTR reporter gene (wt or seed mutant) together with miR-299 or control mimic, respectively ( $n = 5$  per group; wt:  $P = 0.0549$ ; mut:  $P = 0.8982$ ; mimic:  $F_{1,16} = 6.145$ ,  $P = 0.0247$ ; utr-construct:  $F_{1,16} = 0.005108$ ,  $P = 0.9434$ ; mimic  $\times$  utr-construct:  $F_{1,16} = 2.246$ ,  $P = 0.1534$ ); two-way ANOVA.

D 3'UTR luciferase reporter gene assays in cultured rat hippocampal neurons using the Dlgap3 3'UTR reporter gene (wt or seed mutant) after 48 h PTX stimulation ( $n = 5$  per group,  $t_8 = 4.397$ ,  $**P = 0.0023$ ); unpaired Student's  $t$ -test.

Data information: Data are presented as mean  $\pm$  s.d.

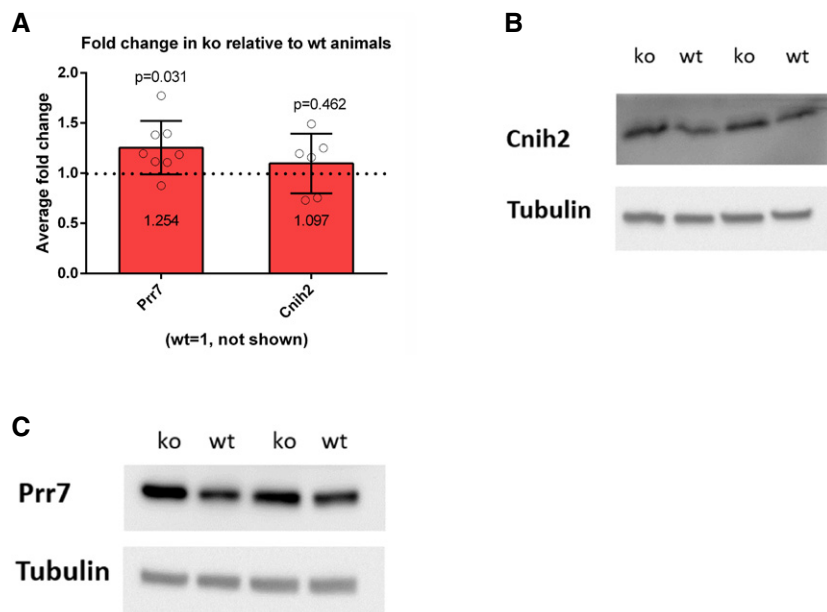

**Figure EV5. Protein expression in hippocampus of 5-week-old juvenile miR379-410 wt and ko mice.**

A Average fold change in ko relative to wt animals is presented (wt = 1, not shown), Cnih2 (wt  $n = 6$ , ko  $n = 6$ ,  $P = 0.4625$ ), Prr7 (wt  $n = 7$ , ko = 8,  $P = 0.0311$ ), one-sample t-test (2.3 test in excel). Data are presented as mean  $\pm$  s.d.

B, C Representative Western blots of Cnih2 and Prr7 protein expression in hippocampus of juvenile mice.
